# Supplementary material for: Knowledge, attitudes, and practices towards mosquito control and used vehicle tire dumping by median household income, in metropolitan New Orleans, Louisiana
Source: PeerJ journal article supplement (doi:10.7717/peerj.14188), 2022-12-02
Supplement: Survey_Final.pdf [file Survey_Final.pdf]

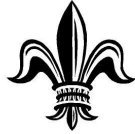

CITY OF NEW ORLEANS  
MOSQUITO, TERMITE AND RODENT CONTROL  
BOARD & SANITATION DEPARTMENT

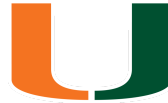

MIAMI

## New Orleans Residents' Perspectives on Illegal Tire Dumping

---

Thank you for agreeing to participate in this study, which aims to understand the extent of used tire dumping in the City of New Orleans. Your feedback will help the city to identify and target areas for mosquito control efforts.

---

Do you store/have used or discarded tires on your property?

Yes

No

---

Where do you most often see disposed used tires?

*Please select all that apply.*

- Abandoned lots
  - On the neutral ground/median
  - Dead end streets
  - Unoccupied, private property
  - Occupied, private residential property
  - Occupied, private business property
  - Under bridges
  - Other:
- 

How likely are you to report an illegal used tire dumping if you saw one?

Very likely

Likely

Somewhat likely

Not likely

---

How willing would you be to participate in a volunteer program to pick up used tires in your neighborhood?

Very willing

Willing

Somewhat willing

Not willing

---

Do you know that the City will pick up up to 4 tires placed next to garbage cans from properties eligible for garbage collection by the City, every second collection of the week for properties outside of the French Quarter/DDD and on Wednesdays for properties inside of the French Quarter/DDD?

Yes

No

**These next questions ask about your perceptions related to the type of communication that should be used by the City of New Orleans to discourage people from illegal used tire dumping and how you would prefer to receive such messages.**

---

How effective are the following strategies at reducing the number of used tires dumped illegally?

|                                                                                                                                                     | Very Ineffective      | Ineffective           | Effective             | Very Effective        |
|-----------------------------------------------------------------------------------------------------------------------------------------------------|-----------------------|-----------------------|-----------------------|-----------------------|
| Publicize that used or waste tires damages the image of our community                                                                               | <input type="radio"/> | <input type="radio"/> | <input type="radio"/> | <input type="radio"/> |
| Publicize that used tires can be a significant breeding source for disease carrying mosquitoes if improperly stored and allowed to accumulate water | <input type="radio"/> | <input type="radio"/> | <input type="radio"/> | <input type="radio"/> |
| Tell citizens that they can report illegal dumping by calling 311                                                                                   | <input type="radio"/> | <input type="radio"/> | <input type="radio"/> | <input type="radio"/> |
| Use a famous person from the area to be an anti-used tire dumping spokesperson                                                                      | <input type="radio"/> | <input type="radio"/> | <input type="radio"/> | <input type="radio"/> |
| Tell people that dumping used tires is not the right thing to do                                                                                    | <input type="radio"/> | <input type="radio"/> | <input type="radio"/> | <input type="radio"/> |
| Remind people that dumping is illegal and violators are subject to fines and criminal prosecution                                                   | <input type="radio"/> | <input type="radio"/> | <input type="radio"/> | <input type="radio"/> |
| Have a slogan that evokes community pride                                                                                                           | <input type="radio"/> | <input type="radio"/> | <input type="radio"/> | <input type="radio"/> |

---

How would you like to receive information about public health and tire dumping?

*Please select all that apply.*

- Social Media
- Radio
- Television
- Newspaper
- Internet
- Magazine
- Billboard
- Friend
- Other

**These next questions ask about your perceptions and knowledge related to mosquito-borne diseases.**

What is the mechanism of transmission of mosquito-borne diseases?

*Please select all that apply.*

Body fluids

Polluted water

Contaminated food

Mosquito bite

Other

---

How often do mosquitoes bite you around your home?

*Please select all that apply.*

Very frequently

Frequently

Occasionally

Seldom or Never

---

Which are mosquito-breeding sites?

*Please select all that apply.*

Tires

Hollow trees

Gutters

In walls

On garbage

Other

---

Which of these preventive measures do you consider more effective to avoid mosquito eggs from hatching of the reproduction of larvae and pupae?

*Please select all that apply.*

Eliminate standing water

Use of larvicide

Wash water containers

Use of fish in water containers

Spraying/fogging your yard

Other

---

Which of these measures do you consider more effective to prevent mosquito bites?

*Please select all that apply.*

Use of insect repellent

Use of bed nets

Use of insecticides by plane or truck

Cover water containers

Use of screens in window and doors

Backyard spray treatment

**These next questions ask about your perceptions related to preventative measures to prevent the risks of mosquito-borne diseases.**

|                                                                                                        | Strongly agree        | Agree                 | Disagree              | Strongly disagree     |
|--------------------------------------------------------------------------------------------------------|-----------------------|-----------------------|-----------------------|-----------------------|
| Mosquito borne diseases are a serious health problem.                                                  | <input type="radio"/> | <input type="radio"/> | <input type="radio"/> | <input type="radio"/> |
| Spraying is the best method to reduce mosquito populations.                                            | <input type="radio"/> | <input type="radio"/> | <input type="radio"/> | <input type="radio"/> |
| Controlling mosquito populations can reduce mosquito-borne diseases.                                   | <input type="radio"/> | <input type="radio"/> | <input type="radio"/> | <input type="radio"/> |
| The City of New Orleans is responsible for reducing the number of mosquito larvae in resident's homes. | <input type="radio"/> | <input type="radio"/> | <input type="radio"/> | <input type="radio"/> |
| It is my responsibility to prevent the spread of mosquito larvae in my home                            | <input type="radio"/> | <input type="radio"/> | <input type="radio"/> | <input type="radio"/> |

---

#### **Preventive Measures Against MBDs**

---

**These questions ask about the preventative measures that you take to prevent yourself and your family against mosquito-borne diseases.**

---

Which practices for preventing mosquito breeding are you using?

*Please select all that apply.*

- Eliminate standing water
  - Use of larvicide
  - Wash water containers
  - Use of fish in water containers
  - Spraying/fogging your yard
  - Other
- 

Which practices for preventing mosquito bites are you using?

*Please select all that apply.*

- Use of insecticide
  - Use of repellent
  - Use of screens in window and doors
  - Use of bed nets
  - Other
-

**Lastly, we'd like to ask you a few questions about your background.**

What is your age?

18 to 24

25 to 34

35 to 44

45 to 54

Over 55

---

What is the highest level of education you have completed?

Less than a high school diploma

Some college

Bachelor's degree (e.g. BA, BS)

Graduate degree (e.g. MA, Msc, PhD, JD, MD)

---

What is your 5-digit home zip code?

---

To which sex do you most identify?

Male

Female

Other

---

What is your marital status?

Single (never married)

Married or in a domestic partnership

Widowed, divorced, or separated

Other

---

What is your current employment status?

Employed full time

Employed part time

Unemployed

Retired or disabled

---

What was your household income range (before taxes) in 2017?

Less than \$20,000

\$20,000 to \$49,999

\$50,000 to \$74,999

Over \$75,000

---

How do you identify yourself? Please select all that apply.

- Vietnamese
  - Middle Eastern
  - Hispanic/Latinx
  - American Indian or Alaska Native
  - Asian
  - Black or African American
  - Native Hawaiian or Other Pacific Islander
  - White
  - Two or more races
  - Other
- 

How would you describe the home you currently live in?

- Single family home
  - Duplex
  - Apartment
  - Condominium
  - Mobile home
  - Other
- 

How would you describe the home you currently live in?

Owner occupied

Rental

Other

---

Would you like to be included in our email database to receive updates on the upcoming anti-used or waste tire program in New Orleans?

Yes

No

---

What is your email address?
